# Supplementary material
Source: PubMed Central journal article supplement (PMC2561162)
Supplement: 97320630002431S1.pdf [file 97320630002431S1.pdf]

### Supplementary material

$$P(S) = F * T \quad \rightarrow \quad (1)$$

where P(S) – Probability of consensus

F – frequency (i.e. No: of particular nucleotide/ Total no in column)

T – transition probability

#### Log odd-score for consensus

$$(S) = \log P(S) - L(AT) \log 0.375 + L(GC) \log 0.125 \quad \rightarrow \quad (2)$$

$$\text{Coverage} = \frac{TP}{\text{Total Number of hits}} \quad \rightarrow \quad (3)$$

TP = Hits acquired which is equal to experimental validation + greater than threshold value of the dataset.

Total number of hits = Total number of hits acquired which is equal to experimental validation.

$$\text{Sensitivity} = \frac{TP}{TP + FN} \quad \rightarrow \quad (4)$$

TP = True Positive

FN = False Negative (total hits occurring below threshold value)

$$\text{Specificity} = \frac{TP}{TP + FP} \quad \rightarrow \quad (5)$$

TP = True Positive

FP = False Positive (total hits occurring above threshold value)

$$\text{Z-Score} = \frac{\text{Score} - \text{Mean}}{\text{Standard Deviation}} \quad \rightarrow \quad (6)$$

Z – Z-score

score – HMM score of the acquired hit

mean – average of all possible sliding windows of upstream of stress gene

std deviation – Standard Deviation of all possible sliding windows of upstream of stress gene.

#### Normalization score

$$\text{The normalization formula is} = \frac{\text{Top 1st rank of z-score of binding site for that TFBS and that stress gene}}{\frac{\text{Total No: of binding sites for that TFBS}}{\text{Total no: of binding sites for all TFBS library and stress gene}}} \quad \rightarrow \quad (7)$$

Total no: of binding for all TFBS library and of all stress genes

### Tables

| S. No | Family name | Sub-family | Stress signal                                                        | Reference (Stress signal)                                   | Name of the Cis-element | Cis-element           | Reference (Cis-element)                                  |
|-------|-------------|------------|----------------------------------------------------------------------|-------------------------------------------------------------|-------------------------|-----------------------|----------------------------------------------------------|
| 1     | ABI3/VP1    |            | ABA                                                                  | Plant J. 2000; 24(1):57-66                                  | distB ABRE              | GCCACTTGTC            | Plant J. 2000; 24(1):57-66                               |
| 2     | AP2/EREBP   | EREBP-ERF  | Cold, Drought                                                        | The Plant Cell, 1998; 10:1391-1406.                         | GCC-box                 | GCCGCC                | The Plant Cell, 1998; 10: 1391-1406.                     |
|       |             | DREB       | Cold, Drought                                                        | Proc. Natl. Acad. Sci., 1997; 94:1035-1040                  | CRT/DRE                 | (A/G)CCGAC            | Proc. Natl. Acad. Sci., 1997, 94:1035-1040               |
| 3     | ARF         |            | Auxin                                                                | PNAS, 1999; 96(10): 5844-9                                  | AuxREs                  | TGTCTC                | PNAS, 1999; 96(10): 5844-9                               |
| 4     | BHLH/myc    |            | NACL, ABA, Drought                                                   | The Plant Cell, 2003; 15: 63-78                             | N box                   | CACG(G/A)C            | The Plant Cell, 2003; 15: 63-78                          |
|       |             |            |                                                                      |                                                             | G box                   | CACGTG                | The Plant Cell, 2003; 15: 1749-1770                      |
| 5     | bZIP        |            | ABA, Drought                                                         | Current Opinion in Plant Biology 2000; 3:217-223            | G box1                  | CCACGTGG              | The Plant Cell, 1992; 4: 1309-1319                       |
|       |             |            |                                                                      |                                                             | G box2                  | TGACG(T/C)            | The Plant Cell, 1992; 4: 1309-1319                       |
|       |             |            |                                                                      |                                                             | G/ABRE                  | (C/T)ACGTGGC          | Journal Of Biological Chemistry, 2000; 275(3): 1723-1730 |
|       |             |            |                                                                      |                                                             | C/ABRE                  | CGCGTG                | Journal Of Biological Chemistry, 2000; 275(3): 1723-1730 |
| 6     | HB          |            | ABA, Drought                                                         | <i>Plant Molecular Biology</i> , 1998; <b>37</b> : 377-384. |                         | CAATNATTG             | Nat. Struct Biol, 1999; 6:464-470                        |
| 7     | HSF         |            | Drought, Cold, Heavy-metal stress and oxidative stress               | Plant Physiol. 1998; 117: 1135-1141                         | HSE                     | TTCNNGAA<br>GAANN TTC | Nat. Struct Biol, 1999; 6:464-470                        |
| 8     | MYB         |            | Dehydration, Wounding                                                | The Plant Cell, 1993; 5:1529-1539                           |                         | (T/C)AAC(G/T) G       | <i>Genes &amp; Dev.</i> 1990; 4: 2235-2241               |
|       |             |            |                                                                      |                                                             |                         | CC(T/A)ACC            | Genetics, 1998; 149: 479-490.                            |
|       |             |            |                                                                      |                                                             |                         | TAACTG                | Plant Journal, 1996; 10(6): 1145-1148                    |
|       |             |            |                                                                      |                                                             |                         | CC(TA)AACC            | Genetics, 1998; 149: 479-490.                            |
| 9     | NAC         |            | Drought, high salinity and ABA                                       | The Plant Cell, 2004; 16: 2481-2498.                        |                         | (C/T)AACN(A/G)        | The Plant Journal, 2003; 33: 259-270                     |
|       |             |            |                                                                      |                                                             |                         | CATGTG                | Plant Mol Biol. 2002; 50(2):237-48.                      |
| 10    | WRKY        |            | Biotic stress (pathogen attack)<br>Abiotic Stress (wind, rain, hail) | <i>Plant Physiology</i> , 2002, 129: 661-677                | W box                   | (T)TGAC(C/T)          | <i>Plant Molecular Biology</i> <b>51</b> : 21-37, 2003.  |

**Table 1:** Abiotic stress responsive transcription factor families.
